1 NetGAM: Using generalized additive models to improve the predictive power of ecological  
2 network analyses constructed using time-series data

3  
4 Samantha J. Gleich<sup>1\*</sup>, Jacob A. Cram<sup>2</sup>, Jake L. Weissman<sup>1</sup>, and David A. Caron<sup>1</sup>

5  
6 <sup>1</sup>Department of Biological Sciences, University of Southern California, 3616 Trousdale Parkway,  
7 AHF, Los Angeles, California 90089-0371, USA

8 <sup>2</sup>Horn Point Laboratory, University of Maryland Center for Environmental Science, 2020 Horns  
9 Point Road, Cambridge, MD 21613, USA

10

11 \* Corresponding author      Email: [gleich@usc.edu](mailto:gleich@usc.edu)      Phone: (732)379-1446

12      Address: 3616 Trousdale Pkwy, AHF 301 Los Angeles, CA 90089-0371

13

14 Competing Interests: This work was supported by Simons Foundation Grant P49802 (to DAC).

15

16

17

18

19

20

21

22

23

24

25 **Abstract**

26 Ecological network analyses are used to identify potential biotic interactions between  
27 microorganisms from species abundance data. These analyses are often carried out using time-  
28 series data; however, time-series networks have unique statistical challenges. Time-dependent  
29 species abundance data can lead to species co-occurrence patterns that are not a result of direct,  
30 biotic associations and may therefore result in inaccurate network predictions. Here, we describe  
31 a generalize additive model (GAM)-based data transformation that removes time-series signals  
32 from species abundance data prior to running network analyses. Validation of the transformation  
33 was carried out by generating mock, time-series datasets, with an underlying covariance  
34 structure, running network analyses on these datasets with and without our GAM transformation,  
35 and comparing the network outputs to the known covariance structure of the simulated data. The  
36 results revealed that seasonal abundance patterns substantially decreased the accuracy of the  
37 inferred networks. Additionally, the GAM transformation increased the F1 score of inferred  
38 ecological networks on average and improved the ability of network inference methods to  
39 capture important features of network structure. This study underscores the importance of  
40 considering temporal features when carrying out network analyses and describes a simple,  
41 effective tool that can be used to improve results.

42

43

44

45

46

47

## 48 **Introduction**

49           Communities of microorganisms exist in virtually all natural environments on the planet  
50 and are shaped by complex interactions. Species-species interactions are diverse and may benefit  
51 both species involved (e.g. mutualism), only one (e.g. commensalism, parasitism), or hurt both  
52 (e.g. competition)[1-2]. Ecological network analyses are increasingly used by microbial  
53 ecologists to identify potential biotic interactions between organisms and to form hypotheses  
54 regarding microbial community structure and function [1, 3-4]. Commonly employed network-  
55 inference methods include pairwise correlation-based, regression-based, and probabilistic  
56 graphical methods [5-6]. All of these methods leverage microbial abundance measurements to  
57 identify co-occurrence patterns between organisms [1, 7-8]. Biotic interactions between  
58 organisms are then predicted based on the species' co-occurrence patterns, resulting in a list of  
59 nodes (organisms) connected by edges (associations) [1, 7-9].

60           Abundance data that are used as input for ecological network analyses are often obtained  
61 through monthly time-series sampling efforts [10-15]. Time-series datasets are valuable because  
62 documenting changes in microbial community structure over long timeframes can provide  
63 information on the monthly, annual, or interannual variability in species abundances [16-17]. For  
64 example, ~11 years of monthly sampling at the San Pedro Ocean Time-Series (SPOT) site  
65 revealed that 23% of bacterial operational taxonomic units (OTUs) demonstrated predictable,  
66 seasonal abundance patterns in surface waters [13]. Another time-series study that took place  
67 over ~6 years in the Western English Channel revealed that the month of year could explain over  
68 half of the variability in bacterial community composition [12]. Such studies highlight how long-  
69 term time-series datasets may be used to identify predictable changes in microbial community  
70 composition over time.

71 Time-series datasets can provide information on microbial community composition and  
72 structure, but ecological networks inferred from them should be built and interpreted with  
73 caution. There are statistical challenges associated with time-series network analyses because the  
74 samples are not independent over time [12, 18-19]. This inherent time-dependence may be  
75 influenced in part by seasonally reoccurring patterns in the abiotic environment (e.g. seasonal  
76 mixing or upwelling events) or long-term changes in the environment over-time (e.g. rising  
77 seawater temperature) [17, 20-21]. As a result of this time-dependence, species abundance  
78 patterns can lead to co-occurrence patterns that yield spurious network predictions [4, 22]. For  
79 instance, two species may both attain maximal abundances during spring nutrient upwelling  
80 events, even if no interactions occur between them. Their shared periodicity in this case may  
81 manifest itself as a ‘false association’. Time-dependence may also confound species co-  
82 occurrence patterns through the effects of Simpson’s paradox [23-24]. If a mutualistic  
83 relationship exists between two species, one might expect a positive correlation between the  
84 abundances of the two species across samples. However, if the species respond differently to a  
85 third variable (e.g. month of year), then the positive association between the two species may be  
86 offset or reversed as a result of this time-dependence [24]. Such inaccurate associations indicate  
87 that caution should be exercised when carrying out network analyses on time-series datasets [7,  
88 24].

89 Here, we propose and validate a generalized additive model (GAM)-based data  
90 transformation that corrects for potentially confounding time-series signals that are prevalent in  
91 microbial relative abundance data. The GAM transformation is conducted prior to carrying out  
92 ecological network analyses, and removes seasonal, long-term, and autocorrelative trends,  
93 thereby allowing researchers to focus on the residual statistical variability of the microbial

94 abundance data. We contend that the residual variability is likely more indicative of true biotic  
95 associations than are untransformed data. We used GAMs in this data transformation method, as  
96 they are versatile, and commonly used to capture non-linear trends typical of time-series data  
97 [25]. Generalized additive models have been used to model both seasonal patterns and long-term  
98 trends in time-series data [25-27] and have also been used to capture autocorrelative signals [17,  
99 28]. The GAM-based data transformation presented here has the potential to capture seasonal,  
100 long-term, and autocorrelative trends in time-series datasets, thus minimizing the influence that  
101 temporal signals have on inferred microbial co-occurrence patterns and increasing the predictive  
102 power of commonly employed networking methods.

103

## 104 **Materials and Methods**

105 Our general strategy was to compare the performance of 4 approaches for inferring  
106 microbial associations from abundance data with overlying time-series signals. The approaches  
107 were (1) pairwise spearman correlation analysis (SCC) [1, 29], (2) Graphical lasso analysis  
108 (Glasso) [30-31], (3) pairwise SCC analysis with a pre-processing step where seasonal and long-  
109 term splines were fit to and subtracted from each variable using a GAM (GAM-SCC), and (4)  
110 Glasso with the same GAM subtraction approach (GAM-Glasso). Our validation strategy for the  
111 GAM transformation consisted of generating mock datasets with underlying associations,  
112 masking those associations by adding seasonal and long-term signals to the abundance data, and  
113 comparing the predicted associations obtained from each network inference method to the true  
114 species-species associations.

115 *Data simulation: Generating mock abundance data with time-series properties*

116 We generated mock abundance datasets that had a predetermined, underlying network  
117 structure and contained long-term and seasonal species abundance patterns. First, a covariance  
118 matrix was generated to describe the relationships between species in a mock network (Figure  
119 S1, Panel 1). The covariance matrices were constructed with underlying network structures that  
120 followed either a Barabási-Albert model, which have scale-free properties, an Erdős-Rényi  
121 model, in which connections between nodes are random, or a model of network topology based  
122 on a real microbial dataset (American Gut Project dataset; Figure S1) [32-33]. The Erdős-Rényi  
123 and Barabási-Albert model datasets were generated so that each dataset contained 400 species  
124 and 200 samples, and the American Gut model datasets were created so that each dataset  
125 contained 127 species and 200 samples. A random Bernoulli distribution was used to simulate  
126 the covariance matrix for the Erdős-Rényi networks. We set the probability of interactions  
127 occurring between species in a given Erdős-Rényi network to 1%, making the simulated  
128 networks 99% sparse. The Barabási-Albert networks were generated using the “sample\_pa”  
129 function in the igraph package [34]. The “graph2prec” function in the SpiecEasi package was  
130 used to predict the covariance matrix of the American Gut Project dataset [33]. The covariance  
131 between species in a dataset was considered “high” when true associations in the covariance  
132 matrix were set to 100. Conversely, the covariance between species was considered “low” if the  
133 true associations in the covariance matrix were set to 10. These covariance matrices describe the  
134 “real”, underlying species interactions in our mock species abundance datasets.

135 After generating a covariance matrix using the Barabási-Albert, Erdős-Rényi, or  
136 American Gut Project model, the mean abundance for each species was generated from a normal  
137 distribution with a mean of 10 and a variance of 1. These mean abundance values and the  
138 covariance matrix were used to parameterize a multivariate normal distribution from which

139 species abundance values for all 200 samples in a dataset were drawn (Figure S1, Panel 2). The  
140 values generated from this multivariate normal distribution were the species abundance values  
141 without time-series features confounding the relationship between 2 associated species.

142 Seasonal trends were added to 0%, 25%, 50% or 100% of the species in the mock  
143 networks. The seasonal signals were generated by plugging a vector of consecutive integers of  
144 length 200 ( $N_t$ ) into the “gradual” (Eqn 1.) or “abrupt” (Eqn 2.) seasonal equations (Figure S1,  
145 Panel 3). The starting value of this vector of consecutive integers was drawn at random to allow  
146 seasonal peaks centered at different months for different species...

147 *Gradual* :  $S_t = \left( \frac{\cos(N_t * 2 * \frac{\pi}{12})}{2} \right) + 0.5$  Eqn 1.

148 *Abrupt*:  $S_t = \left( \left( \frac{\cos(N_t * 2 * \frac{\pi}{12})}{2} \right) + 0.5 \right)^{10}$  Eqn 2.

149 ...where  $N$  is the random vector of consecutive integers,  $S$  is the output seasonal vector, and  $t$  is  
150 the index of vectors  $N$  and  $S$ . Each element in the seasonal vector ( $S_t$ ) was then multiplied by the  
151 corresponding element in the abundance vector ( $X_t$ ) of a specific species to obtain mock species  
152 abundance values with a “gradual” or “abrupt” seasonal trend.

153 A long-term time-series trend was added to the abundance values of 0% or 50% of the  
154 species in the mock datasets (Figure S1, Panel 4). When a long-term signal was applied to 50%  
155 of the species in a dataset, half of the species were randomly selected to have this long-term  
156 trend. Then, a vector of linear values was generated following Eqn 3, such that

157 *Long – term trend*:  $L_t = m(L_{t-1}) + 0.01$  Eqn 3.

158  $L_t$  is the point in the line at the next time point and  $m$  is the slope of the line. The slope parameter  
159 ( $m$ ) was generated from a random normal distribution with a mean of 0.01 and a variance of  
160 0.01. Half of the long-term trends generated had a positive slope (increasing over time) and half

161 had a negative slope (decreasing over time). After generating the vector of linear values ( $L_t$ ),  
162 each element of this vector was added to each element of the abundance vector ( $X_t$ ) of a specific  
163 species to simulate long-term time-series trends for selected species.

164 Time-series predictor columns were added to each dataset after applying monthly and  
165 long-term abundance trends to a portion of the species in the mock datasets. The predictor  
166 columns that were used in the downstream GAM-based data transformation were the month of  
167 the year (i.e. 1-12) and the day of the time-series (i.e. 1-200). In total, we generated 100 mock  
168 datasets for every combination of conditions (Table S1), resulting in 8 400 mock time-series  
169 datasets that were used in the downstream GAM transformation and network analysis  
170 procedures.

#### 171 *Data simulation: Simulating count data from abundance values*

172 The time-series species abundance data were transformed to make the abundance values  
173 resemble high-throughput sequencing data because microbial time-series sampling efforts are  
174 often processed using such molecular methods (e.g. tag-sequencing, meta-omics). Relative  
175 abundances of different species in natural communities are highly skewed, so that relatively few  
176 species constitute most of the organisms in a sample although many rare species are also present  
177 [35-36]. To transform abundance data into sequence data that look like a natural community,  
178 species abundances were first exponentiated to increase the prevalence of abundant species and  
179 to decrease the prevalence of rare species (Figure S1, Panel 5). These exponentiated species  
180 abundance values were then converted to relative abundance values because microbial  
181 abundances are dependent on sequencing depth in high-throughput sequencing studies and are  
182 therefore inherently relative (i.e. compositional) [37]. The relative abundance values were  
183 calculated by dividing each species count by the sum of all species counts in each sample (Figure



184 S1, Panel 6). The resulting relative abundance values and time-series predictor variables were  
185 then used in data normalization and GAM-transformation steps prior to carrying out the network  
186 analyses.

187 *Network inference: Count data normalization and GAM transformation*

188 A variety of steps were taken to reverse the above transformation steps and back out the  
189 species-species relationships in the underlying networks. We advocate these steps to infer  
190 network structure from a real time-series dataset. A centered log-ratio (CLR) transformation was  
191 first applied to the species relative abundance values to normalize the mock species abundance  
192 data across samples using the “clr” function in the compositions package in R (Figure 1) [38].  
193 This transformation step is important to avoid spurious inferences induced by the inherent  
194 compositionality of relative abundance data [31, 33, 37]. The CLR-transformed dataset was  
195 copied, with one copy subjected to a subsequent GAM transformation, and the other one not  
196 GAM-transformed.

197 The GAM-transformation was carried out by fitting GAMs to each individual species in  
198 the dataset to remove monthly signals, long-term trends, and autocorrelation from the species  
199 abundance data. These GAMs were fit using the “gamm” function in the mgcv package in R [39-  
200 40]. The GAMs that were used included the “month of year” parameter as a cyclical spline  
201 predictor and the “day of time-series” parameter as a thin-plate spline predictor (Figure 1).  
202 Additionally, the first GAM included a continuous AR1 correlation structure term in the model.  
203 This GAM was revised for specific species in the dataset when the GAM could not be resolved  
204 or when significant autocorrelation was detected in the GAM residuals (Figure 1). This GAM  
205 revision step tested a number of different correlation structure terms (i.e. AR1, CompSymm,  
206 Exp, and Gaus) in the models and is automated in the NetGAM package, which we have

207 published. After fitting a GAM to all of the species in the input dataset, the residuals of each  
208 GAM were extracted and were used as the new, GAM-transformed abundance values for each  
209 species (Figure 1). These GAM residuals represent species abundance values with a reduced  
210 influence of time and were used as input in the downstream GAM-SCC and GAM-Glasso  
211 network analyses.

### 212 *Network inference: Network runs and statistical analyses*

213 The pre-processed species abundance data with and without the GAM-removal of time-  
214 series signals were used in the 2 networking methods of interest (SCC and Glasso) in order to  
215 compare the outputs of the 4 network inference approaches (SCC, GAM-SCC, Glasso, and  
216 GAM-Glasso). A nonparanormal transformation was first applied to the species abundance  
217 datasets with and without GAM transformation using the “huge.npn” function in the huge  
218 package in R [41]. Spearman correlation networks (SCC, GAM-SCC) were then constructed by  
219 calculating the correlation between every pair of species in the mock abundance datasets. A  
220 Bonferroni-corrected  $p$ -value of 0.01 was used as a cutoff to identify edges in these SCC  
221 networks. The Glasso networks (Glasso, GAM-Glasso) were constructed by testing 30  
222 regularization parameter values (i.e. lambdas) in each network using the “batch.pulsar” (criterion  
223 = “stars”; rep.num = 50) function in the pulsar package in R [42]. The lambda that resulted in the  
224 most stable network output was selected using the StARS method [43]. Finally, the graph that  
225 resulted from the StARS output was used to obtain a species adjacency matrix for the Glasso  
226 networks with and without GAM transformation.

227 The Glasso adjacency matrices and the SCC results were used to generate lists of species-  
228 species associations predicted by the network outputs. The species-species associations predicted  
229 by the networks were then compared to the true species-species associations and the F1 scores of

230 the network predictions were calculated. The F1 score is a measure of classification performance  
231 (presence or absence of an edge) that, unlike accuracy, accounts for uneven classes, which is  
232 essential when dealing with sparse networks. The F1 scores of the GAM-transformed networks  
233 (GAM-SCC, GAM-Glasso) were compared to the networks that did not undergo GAM  
234 transformation (SCC, Glasso) using paired Wilcoxon tests with Bonferroni correction. An  
235 adjusted  $p$ -value of 0.01 was used as a cutoff to identify under what circumstances the GAM  
236 significantly improved the F1 score of a Glasso or SCC network. Information about the  
237 effectiveness of the GAM transformation in improving the predictive power of the time-series  
238 networks was thereby obtained.

#### 239 *Network inference: Comparison of predicted network structures*

240 Additional networks were generated using the methods described above to compare the  
241 predicted network structures obtained from the four network approaches (GAM-Glasso, Glasso,  
242 GAM-SCC, and SCC) to the real network structures. The average clustering coefficient and the  
243 degree distribution of these additional network outputs were calculated and used for the network  
244 structure comparisons. The average clustering coefficient of a network describes the likelihood  
245 that two species that are both associated with a third species are also associated with each other  
246 [44], and in a sense describes the “clumpiness” of a network. The network degree distributions  
247 describe the probability distribution of the number of interactions per node in a network [45].

248 The network structure comparisons were carried out by generating 100 additional  
249 Barabási-Albert and Erdős-Rényi datasets with high species-species covariance. Each of the  
250 mock, time-series datasets that were used as input in these additional network runs contained 100  
251 species and 200 samples. Additionally, 50% of the species in each of these datasets had a  
252 gradual, seasonal abundance pattern (Figure S1, Panel 3). The SCC, GAM-SCC, Glasso, and

253 GAM-Glasso networking approaches were used to obtain network predictions for these extra  
254 network iterations and the average precision, recall, and F1 score obtained from each of the four  
255 approaches was calculated. The average clustering coefficients of the networks were also  
256 calculated and were compared to the average clustering coefficients of the real Barabási-Albert  
257 and Erdős-Rényi networks. Finally, the degree distributions of the network runs were calculated  
258 and plotted alongside to the real network degree distributions.

259

## 260 **Results**

### 261 *Seasonal abundance patterns decreased the performance of network inference methods*

262 The F1 scores of the reconstructed network outputs generally decreased (indicating worse  
263 performance) as the proportion of species in the mock dataset with a seasonal abundance pattern  
264 increased. The decreases in network F1 scores with increases in the percent of species with a  
265 seasonal abundance pattern were always prevalent in the Glasso and SCC networks when the  
266 GAM transformation was not applied and when some percentage of species (> 0%) in the mock  
267 datasets had a seasonal abundance pattern (Figure 2, Tables S2-S4). In general, the highest F1  
268 scores were associated with networks that did not contain any species with an underlying  
269 seasonal signal (0%), while the lowest F1 scores were typically associated with networks in  
270 which all of the species had a seasonal abundance pattern (100%; Figure 2, Tables S2-S4).

271 The general decline in network F1 score with a greater percentage of species exhibiting  
272 seasonality was often less pronounced when the mock datasets were GAM-transformed prior to  
273 carrying out the network analyses. For example, when species-species covariance was high, the  
274 GAM-SCC method tended to perform similarly regardless of whether 25%, 50%, or 100% of the  
275 species in a Barabási-Albert or American Gut dataset network had a gradual seasonal abundance

276 pattern (Figure S3 and S7; Panels B and F). The decline in network F1 score with increases in  
277 the percentage of species exhibiting seasonality was also less pronounced in GAM-Glasso  
278 networks when there was high covariance between species and when some of the species in the  
279 input dataset had a gradual, seasonal abundance pattern (Figures S2, S4, and S6; Panels B and F).  
280 *GAM transformation improved network inference on average*

281 The GAM transformation increased the F1 score of the Glasso networks in 82.0% of all  
282 network runs (Figure 2; Panels A-C; most points fall below the 1:1 line). Specifically, the GAM  
283 transformation significantly increased the mean F1 score of the Glasso networks when a gradual  
284 seasonal signal (Figure S1; Panel 3) was applied to some fraction of the species in the input  
285 dataset (Figures S2, S4, and S6; Panels B, D, F, and H). The GAM-Glasso networks also had  
286 significantly higher F1 scores when 50% of species in the input dataset had an abrupt, seasonal  
287 abundance pattern (Figures S2, S4, and S6; Panels A, C, E, and G). For the Barabási-Albert  
288 models, the F1 scores of the GAM-Glasso networks were significantly greater than those of the  
289 Glasso networks when 50% of the species in the input dataset had a long-term trend with no  
290 (0%) seasonality (Figure S2; Panels E-H). Similar increases in F1 score were noted in the Erdős-  
291 Rényi and American Gut dataset, GAM-Glasso networks when the covariance between species  
292 was low and when 50% of the species in the dataset had long-term changes in abundance with no  
293 (0%) seasonality (Figure S4 and S6; Panels G and H).

294 The GAM transformation also led to substantial increases in the F1 score of the SCC  
295 networks. Overall, the GAM transformation increased the F1 score of SCC networks in 79.3% of  
296 all network runs (Figure 2; Panels D-F; most points fall below the 1:1 line). The average F1  
297 scores of the networks were significantly greater when the data were GAM-transformed prior to  
298 carrying out a SCC network analysis when a gradual seasonal signal (Figure S1; Panel 3) was

299 applied to some fraction of the species in the input dataset (Figures S3, S5, and S7; Panels B, D,  
300 F, and H). The mean F1 scores of all GAM-SCC networks were also significantly greater than  
301 those of the SCC networks when there was high covariance between species and when an abrupt  
302 seasonal signal (Figure S1, Panel 3) was applied to 25% or 50% of the species in the input  
303 dataset (Figures S3, S5, and S7; Panels A and E).

304 *GAM transformation improved the ability of Glasso and SCC networks to capture real network*  
305 *structure*

306 The GAM-transformation improved the ability of the Glasso and SCC methods to capture  
307 the underlying structure of the Barabási-Albert and Erdős-Rényi networks (Figures 3-4). The real  
308 network degree distributions were more similar to the GAM-SCC and GAM-Glasso degree  
309 distributions than they were to the degree distributions of the SCC and Glasso networks without  
310 GAM transformation (Figures 3-4). The GAM-SCC approach was the most successful in  
311 capturing the real, scale-free Barabási-Albert network degree distribution and had the highest  
312 average precision, recall, and F1 score of the 4 methods tested (Figure 3; Panel C). Conversely,  
313 the GAM-Glasso approach did the best job of capturing the real, Erdős-Rényi network structure,  
314 as the SCC and GAM-SCC approaches predicted a number of high-degree nodes that were not  
315 present in the true, network structures (Figure 4; long right tail on SCC and GAM-SCC plots).  
316 Some high-degree nodes were also predicted in the Glasso and GAM-Glasso, Erdős-Rényi  
317 networks (Figure 4; long right tail on Glasso and GAM-Glasso plots) but in general were less  
318 pronounced than those noted in the SCC and GAM-SCC degree distributions.

319 The average clustering coefficient of the GAM-Glasso networks was the most similar to  
320 the average clustering coefficient of the real networks, while the average clustering coefficient of  
321 the GAM-SCC networks was the least similar to that of the real networks (Figures 3-4). The

322 exaggerated average clustering coefficients of the SCC and GAM-SCC networks were to be  
323 expected, given the transitive nature of correlative relationships between variables. In general,  
324 the average clustering coefficient values that were obtained from the 4 network prediction  
325 approaches were substantially higher than the average clustering coefficient values of the real  
326 networks regardless of whether the underlying network structure was that of a Barabási-Albert or  
327 an Erdős-Rényi model. These high, average clustering coefficient values implied that the outputs  
328 obtained from the network inference approaches resulted in networks that were “clumpier” than  
329 the real networks.

330 *Effectiveness of the GAM transformation decreased when seasonal abundance patterns were*  
331 *abrupt*

332         The GAM transformation slightly decreased the predictive power of a small subset of the  
333 Glasso networks when abrupt seasonal abundance patterns (Figure S1; Panel 3) were prevalent in  
334 the input dataset (Figure S2, S4, and S6; Panels A, C, E, and G). Specifically, when the  
335 covariance between species was high and all of the species (100%) in the input dataset had an  
336 abrupt seasonal abundance pattern, the F1 scores of the Glasso networks were significantly  
337 greater than those of the GAM-Glasso networks, though the magnitude of the differences in  
338 performance were minor (Figures S2, S4, and S6; Panel A). The GAM transformation also  
339 decreased or did not alter the F1 score for a small number of the SCC networks when abrupt  
340 seasonal abundance patterns were noted in the input dataset. Again, these differences in  
341 performance were small. The lower GAM-SCC network F1 scores were most prevalent when  
342 abrupt seasonal abundance patterns were coupled with low species-species covariance (Figures  
343 S3, S5, and S7; Panels C and G). There were also some statistically significant, but very small,  
344 decreases in the GAM-SCC F1 scores relative to the SCC F1 scores when 50% of the species in

345 the input dataset had long-term increases or decreases in abundance without having seasonal  
346 abundance patterns (0%) (Figures S3, S5, and S7; Panels E-F).

347 In sum, there was never a substantial decrease, and there was often a substantial increase,  
348 in network predictive power when applying the GAM transformation to the data before network  
349 inference in our network simulations.

350

## 351 **Discussion**

352 Ecological co-occurrence networks can be useful for capturing complex, biotic  
353 interactions when applied to high-throughput sequencing datasets of microbial communities.  
354 However, networks can yield inaccurate associations if time-series properties (i.e. seasonality,  
355 long-term trends, and autocorrelation) are prevalent in the dataset [4, 22]. The performance of  
356 the SCC and Glasso methods used in this study tended to decrease as the number of species with  
357 a seasonal abundance pattern in a dataset increased (Figure 2, Tables S2-S4). This finding  
358 indicates that time-series networks can result in a higher number of false positive and false  
359 negative associations than networks that are constructed with datasets that lack time-series  
360 features. It is likely that the false positive associations that were detected in our time-series  
361 network outputs were indirect associations that resulted from the shared periodicity of two or  
362 more species over time. Additionally, true species-species associations may have been missed by  
363 our network runs (false negatives) if seasonal and long-term signals overpowered the influence  
364 that other organisms had on species abundance patterns.

365 The GAM transformation carried out prior to network construction in this study improved  
366 SCC and Glasso network inference on average (Figure 2). The generally higher F1 scores that  
367 were noted following GAM transformation (Figure 2) suggest that the GAM model was able to



368 successfully capture and remove many of the seasonal and long-term signals that were prevalent  
369 in the mock communities. Previous efforts have been made to account for indirect or time-  
370 dependent associations in network analyses. For example, the EnDED program (environmentally  
371 driven edge detection) uses environmental variables (e.g. temperature, salinity, etc.) to predict  
372 and remove indirect, environmentally driven associations in an ecological network after network  
373 inference has already been performed, provided that environmental metadata are available [46].  
374 Time-ordered networks have also been used by researchers to account for time when conducting  
375 network analyses [22, 47]. In time-ordered networks, a node is created for each species at each  
376 time point in a dataset, thus allowing those networks to capture associations between species at  
377 specific points in time [47]. However, this approach makes no correction for seasonal or long-  
378 term trends. The GAM-based data transformation proposed here provides an effective tool that  
379 can be used to account for multiple time-series features prior to carrying out ecological network  
380 analyses, can be tailored to a wide variety of time-series datasets, and can be used in conjunction  
381 with any downstream networking method.

382         The SCC and Glasso network comparisons carried out in this study demonstrated that  
383 both of these methods have unique strengths and weaknesses and that method selection may  
384 depend on the research question(s) being asked. With Barabási-Albert networks, the GAM  
385 transformation improved the F1 score and the degree distribution of the SCC networks more than  
386 those of the Glasso networks (Figure 3). It is known that correlation-based networks tend to  
387 capture both direct and indirect associations in an input dataset [4, 9, 17], while Glasso networks  
388 can avoid capturing indirect associations [31]. The notably higher F1 scores and improvements  
389 in the degree distribution plots that were observed in the GAM-SCC networks relative to the  
390 SCC networks is presumably due to ability of the GAM to remove many of the indirect

391 associations that would otherwise be detected in the SCC network analyses. While the GAM-  
392 SCC approach captured the real, Barabási-Albert degree distribution better than the GAM-Glasso  
393 approach, the GAM-Glasso approach was better able to capture the real, Erdős-Rényi degree  
394 distribution (Figure 4). Additionally, the average clustering coefficients of the GAM-Glasso  
395 networks were the most similar to the real, Barabási-Albert and Erdős-Rényi networks (Figures  
396 3-4), suggesting that the GAM-Glasso networks were more similar to the real networks than the  
397 SCC networks in terms of network “clumpiness”.

398         The degree to which GAM transformation improved network prediction depended on  
399 four factors: (1) the underlying structure of the network, (2) the fraction of species exhibiting a  
400 seasonal abundance pattern, (3) the type of seasonal abundance pattern (i.e. gradual or abrupt),  
401 (4) and the presence of long-term trends in species abundances over time. The GAM  
402 transformation did not substantively improve network inference when abrupt seasonal abundance  
403 patterns were prevalent (Figures S2-S7). It is possible that the smoothing functions used in the  
404 GAMs were unable to capture the some of the periodic spikes in species abundance that were  
405 noted in the abrupt, seasonal abundance patterns and therefore did not fully remove these abrupt  
406 signals. It is also possible that the GAM transformation inadvertently removed the influence that  
407 other species in the dataset had on the abundance pattern of a specific species and therefore  
408 decreased the number of true positive associations detected in the networks created using the  
409 GAM-transformed data (GAM-SCC, GAM-Glasso). The observation that the GAM method did  
410 not always improve model performance when seasonal abundance patterns were abrupt suggests  
411 an opportunity for future improvement. Generalized additive models are good at fitting smooth  
412 trends in the data, but other methods might be better at removing abrupt seasonal signals. In any

413 event, decreases in the F1 scores under these specific conditions (Figures S2-S7) were marginal  
414 relative to the benefits obtained using the GAM transformation (Figure 2).

415 We did not explore whether our GAM removal method improved the performance of  
416 network analysis tools beyond SCC and Glasso, and it may be beneficial to expand the analysis  
417 to other approaches. Extended local Similarity Analysis (eLSA) which identifies time lagged  
418 associations [48] and Liquid Analysis (LA) which explores interactions between trios of  
419 variables [49-50] would likely be improved by removing seasonal signals. We note that both of  
420 these methods lack Glasso's ability to exclude spurious associations [31]. Generating a method  
421 that can identify sparse networks, time-lagged associations and three-way interactions, while  
422 removing seasonal signals would be a clear future direction for a robust and flexible analysis of  
423 high-throughput data.

424

## 425 **Conclusion**

426 The results of this study highlight the importance of considering temporal features when  
427 carrying out ecological network analyses with time-series data, given that time-dependent  
428 species abundance patterns may confound network predictions. The GAM-based data  
429 transformation presented here (NetGAM) provides a simple, yet effective tool that can be used to  
430 reduce the influence that time-series properties have on microbial abundance data prior to  
431 network construction. We published our method in a publicly available R package  
432 (<https://github.com/sgleich/NetGAM>) so that this data transformation can be used by other  
433 researchers in future time-series network analysis efforts. Accounting for seasonal abundance  
434 patterns, long-term trends, and autocorrelation in time-series datasets using our GAM method  
435 may substantially improve network inference. We recommend that future networking studies

436 account for time-dependent species abundance patterns that may be prevalent in an input dataset  
437 in order to reduce the number of false positive and false negative associations that are detected  
438 through time-series network analyses.

439

#### 440 **Acknowledgements**

441 This work and SJG were supported by the Simons Foundation Grant P49802 (to DAC). JLW was  
442 supported by a postdoctoral fellowship Simons Foundation Award 653212. We thank Ben Tully  
443 and the members of the Bioinformatics Virtual Coordination Network (BVCN) for creating and  
444 contributing to the online platform that inspired this project.

445

#### 446 **Competing Interests**

447 This work was supported by Simons Foundation Grant P49802 (to DAC).

448

#### 449 **References**

- 450 1. Faust K, Raes J. Microbial interactions: from networks to models. *Nat Rev Microbiol.*  
451 2012;10(8):538-50.
- 452 2. Moëgne-Loccoz Y, Mavingui P, Combes C, Normand P, Steinberg C. Microorganisms and  
453 biotic interactions. In: Bertrand JC, Caumette P, Lebaron P, Matheron R, Normand P, Sime-  
454 Ngando T (eds). Environmental microbiology: fundamentals and applications (Springer,  
455 Dordrecht, 2015) pp 395-444.
- 456 3. Chaffron S, Rehrauer H, Pernthaler J, Von Mering C. A global network of coexisting  
457 microbes from environmental and whole-genome sequence data. *Genome Res.*  
458 2010;20(7):947-59.

- 459 4. Carr A, Diener C, Baliga NS, Gibbons SM. Use and abuse of correlation analyses in  
460 microbial ecology. *ISME J.* 2019;13(11):2647-55.
- 461 5. Layeghifard M, Hwang DM, Guttman DS. Disentangling interactions in the microbiome: a  
462 network perspective. *Trends Microbiol.* 2017;25(3):217-28.
- 463 6. Matchado M.S. et al. Network analysis methods for studying microbial communities: A mini  
464 review. *Comput Struct Biotechnol.* 2021; 19:2687-2698.
- 465 7. Barner AK, Coblenz KE, Hacker SD, Menge BA. Fundamental contradictions among  
466 observational and experimental estimates of non-trophic species interactions. *Ecology.*  
467 2018;99(3):557-66.
- 468 8. Freilich MA, Wieters E, Broitman BR, Marquet PA, Navarrete SA. Species co-occurrence  
469 networks: Can they reveal trophic and non-trophic interactions in ecological communities?  
470 *Ecology.* 2018;99(3):690-9.
- 471 9. Weiss S. et al. Correlation detection strategies in microbial data sets vary widely in  
472 sensitivity and precision. *ISME J.* 2016;10(7):1669-81.
- 473 10. Eiler A, Hayakawa DH, Rappé MS. Non-random assembly of bacterioplankton communities  
474 in the subtropical North Pacific Ocean. *Front Microbiol.* 2011;2:140.
- 475 11. Steele J.A. et al. Marine bacterial, archaeal and protistan association networks reveal  
476 ecological linkages. *ISME J.* 2011;5(9):1414-25.
- 477 12. Gilbert J.A. et al. Defining seasonal marine microbial community dynamics. *ISME J.*  
478 2012;6(2):298-308.
- 479 13. Chow C.E.T. et al. Temporal variability and coherence of euphotic zone bacterial  
480 communities over a decade in the Southern California Bight. *ISME J.* 2013;7(12):2259-73.

- 481 14. Cram J.A. et al. Cross-depth analysis of marine bacterial networks suggests downward  
482 propagation of temporal changes. *ISME J.* 2015;9(12):2573-86.
- 483 15. Deutschmann I. et al. Disentangling temporal associations in marine microbial networks.  
484 Preprint at <https://doi.org/10.21203/rs.3.rs-404332/v1> (2021).
- 485 16. Karl DM, Church MJ. Microbial oceanography and the Hawaii Ocean Time-series  
486 programme. *Nat Rev Microbiol.* 2014;12(10):699-713.
- 487 17. Fuhrman JA, Cram JA, Needham DM. Marine microbial community dynamics and their  
488 ecological interpretation. *Nat Rev Microbiol.* 2015;13(3):133-46.
- 489 18. Fuhrman J.A. et al. Annually reoccurring bacterial communities are predictable from ocean  
490 conditions. *PNAS.* 2006;103(35):13104-9.
- 491 19. Martin-Platero A.M. et al. High resolution time series reveals cohesive but short-lived  
492 communities in coastal plankton. *Nat Commun.* 2018;9(1):1-11.
- 493 20. Comeau AM, Li WK, Tremblay J-É, Carmack EC, Lovejoy C. Arctic Ocean microbial  
494 community structure before and after the 2007 record sea ice minimum. *PLoS One.*  
495 2011;6(11):e27492.
- 496 21. Giovannoni SJ, Vergin KL. Seasonality in ocean microbial communities. *Science.*  
497 2012;335(6069):671-6.
- 498 22. Blonder B, Wey TW, Dornhaus A, James R, Sih A. Temporal dynamics and network  
499 analysis. *Methods Ecol Evol.* 2012;3(6):958-72.
- 500 23. Scheiner SM, Cox SB, Mittelbach GG, Osenberg C, Kaspari M. Species richness, species-  
501 area curves and Simpson's paradox. *Evol Ecol Res.* 2000;2(6):791-802.
- 502 24. Armitage DW, Jones SE. How sample heterogeneity can obscure the signal of microbial  
503 interactions. *ISME J.* 2019;13(11):2639-46.

- 504 25. Ravindra K, Rattan P, Mor S, Aggarwal AN. Generalized additive models: Building evidence  
505 of air pollution, climate change and human health. *Environ Int.* 2019;132:104987.
- 506 26. Cram J.A. et al. Seasonal and interannual variability of the marine bacterioplankton  
507 community throughout the water column over ten years. *ISME J.* 2015;9(3):563-80.
- 508 27. Murphy RR, Perry E, Harcum J, Keisman J. A generalized additive model approach to  
509 evaluating water quality: Chesapeake Bay case study. *Environ Model Softw.* 2019;118:1-13.
- 510 28. Otto SA, Kadin M, Casini M, Torres MA, Blenckner T. A quantitative framework for  
511 selecting and validating food web indicators. *Ecol Indic.* 2018;84:619-31.
- 512 29. Friedman J, Alm EJ. Inferring correlation networks from genomic survey data. *PLoS One.*  
513 2012;8(9):e1002687.
- 514 30. Friedman J, Hastie T, Tibshirani R. Sparse inverse covariance estimation with the graphical  
515 lasso. *Biostatistics.* 2008;9(3):432-41.
- 516 31. Kurtz Z.D. et al. Sparse and compositionally robust inference of microbial ecological  
517 networks. *PLoS Comput Biol.* 2015;11(5):e1004226.
- 518 32. McDonald D. et al. American Gut: an open platform for citizen science microbiome research.  
519 *mSystems.* 2018; 3(3):e00031-18.
- 520 33. Kurtz Z, Mueller C, Miraldi E, Bonneau R. SpiecEasi: Sparse inverse covariance for  
521 ecological statistical inference. R package version. 2017; 1(2).
- 522 34. Csardi G, Nepusz T. The igraph software package for complex network research. *Int J*  
523 *Complex.* 2006; 1695(5):1-9.
- 524 35. Sogin M.L. et al. Microbial diversity in the deep sea and the underexplored “rare biosphere”.  
525 *PNAS.* 2006;103(32):12115-20.

- 526 36. Caron DA, Countway PD. Hypotheses on the role of the protistan rare biosphere in a  
527 changing world. *Aquat Microb Ecol.* 2009;57(3):227-38.
- 528 37. Espinoza JL, Shah N, Singh S, Nelson KE, Dupont CL. Applications of weighted association  
529 networks applied to compositional data in biology. *Environ Microbiol.* 2020;22(8):3020-38.
- 530 38. Van den Boogaart KG, Tolosana-Delgado R. “Compositions”: a unified R package to  
531 analyze compositional data. *Comput Geosci.* 2008;34(4):320-38.
- 532 39. Wood SN. Stable and efficient multiple smoothing parameter estimation for generalized  
533 additive models. *J Am Stat Assoc.* 2004;99(467):673-86.
- 534 40. Wood SN. Fast stable restricted maximum likelihood and marginal likelihood estimation of  
535 semiparametric generalized linear models. *J R Stat Soc: Series B (Statistical Methodology).*  
536 2011;73(1):3-36.
- 537 41. Zhao T, Liu H, Roeder K, Lafferty J, Wasserman L. The huge package for high-dimensional  
538 undirected graph estimation in R. *J Mach Learn Res.* 2012;13(1):1059-62.
- 539 42. Müller CL, Bonneau R, Kurtz Z. Generalized stability approach for regularized graphical  
540 models. arXiv preprint *arXiv:160507072* (2016).
- 541 43. Liu H, Roeder K, Wasserman L. Stability approach to regularization selection (stars) for high  
542 dimensional graphical models. *Adv Neural Inf Process Syst.* 2010;24(2):1432.
- 543 44. Barrat A, Barthelemy M, Pastor-Satorras R, Vespignani A. The architecture of complex  
544 weighted networks. *PNAS.* 2004;101(11):3747-52.
- 545 45. Poisot T, Gravel D. When is an ecological network complex? Connectance drives degree  
546 distribution and emerging network properties. *PeerJ.* 2014;2:e251.
- 547 46. Deutschmann I.M. et al. Disentangling environmental effects in microbial association  
548 networks. Preprint at <http://doi.org/10.21203/rs.3.rs-404332/v1> (2020).



- 549 47. Blonder B, Dornhaus A. Time-ordered networks reveal limitations to information flow in ant  
550 colonies. *PLoS One*. 2011;6(5):e20298.
- 551 48. Xia L.C. et al. Extended local similarity analysis (eLSA) of microbial community and other  
552 time series data with replicates. *BMC Syst Biol*. 2011;5(2):1-12.
- 553 49. Li K-C. Genome-wide coexpression dynamics: theory and application. *PNAS*.  
554 2002;99(26):16875-80.
- 555 50. Ai D. et al. Explore mediated co-varying dynamics in microbial community using integrated  
556 local similarity and liquid association analysis. *BMC Genomics*. 2019;20(2):117-28.

557

## 558 **Figure Legends**

559 **Figure 1:** Steps used to carry out the GAM-based transformation of time-series species  
560 abundance data prior to carrying out pairwise spearman correlation (SCC) and graphical lasso  
561 (Glasso) ecological network analyses. The raw, species abundance data were first CLR-  
562 transformed (1). Generalized additive models (GAMs) were then fit to each species in the dataset  
563 (2) and the residuals of each GAM were checked for significant autocorrelation (3). The  
564 residuals of each GAM were extracted (4) and were used as input in the SCC and Glasso  
565 network analysis methods (5). Finally, the GAM-transformed network outputs were obtained (6;  
566 see text for additional details).

567 **Figure 2:** F1 scores of the networks constructed without GAM transformation (y-axis) plotted  
568 against the F1 scores of the GAM-transformed networks (x-axis) for all of the mock time-series  
569 datasets that were simulated. Panels A-C show the comparison between the Glasso and the  
570 GAM-Glasso networks, while panels D-F show the comparison between the SCC and the GAM-  
571 SCC networks. The dashed, black lines show the 1:1 relationship. Data points below the 1:1 line

572 depict network outputs that had a higher F1 score after applying the GAM-based data  
573 transformation, while data points that fall above the 1:1 line depict network runs that had a  
574 higher F1 score without applying the GAM-based data transformation prior to network  
575 construction.

576 **Figure 3: The GAM-SCC networks did the best job of capturing the real, Barabási-Albert**  
577 **network degree distribution.** The degree distributions and network outputs of 100 GAM-  
578 Glasso (A), Glasso (B), GAM-SCC (C), and SCC (D) time-series networks constructed with 100  
579 species. The networks depicted were constructed with mock species abundance data that had an  
580 underlying Barabási-Albert network structure and that contained 50 species with a gradual,  
581 seasonal abundance pattern. The fine green lines on the log-log plots show the real degree  
582 distributions and the fine black lines show the network-predicted degree distributions. The  
583 bolded lines show the degree distributions of the representative networks that are depicted. On  
584 the representative network images, the red edges show those edges that are true positive  
585 associations, the blue edges show those edges that are false negative associations, and the grey  
586 edges show those edges that are false positive associations. The black nodes in the network  
587 images represent the species that have a seasonal abundance pattern, while the grey nodes  
588 represent those species that do not have a seasonal abundance pattern.

589 **Figure 4: The GAM-Glasso networks did the best job of capturing the real, Erdős-Rényi**  
590 **network topology.** The degree distributions and network outputs of 100 GAM-Glasso, Glasso,  
591 GAM-SCC, and SCC time-series networks constructed with 100 species. The networks depicted  
592 were constructed with mock species abundance data that had an underlying Erdős-Rényi network  
593 structure and that contained 50 species with a gradual, seasonal abundance pattern. Panels and  
594 color coding are the same as described for Figure 3.

1.) CLR-transform species abundance data.

|      | Species 1 | Species 2 | Species 3 |
|------|-----------|-----------|-----------|
| May  | 0         | -1.38     | -1.12     |
| Jun  | -0.83     | 1.02      | 3.32      |
| Jul  | 0         | 0.64      | 0         |
| Aug  | 0         | -2.01     | 0         |
| Sept | -1.21     | 1.14      | 4.13      |

2.) Model species abundance data as a function of month and day of time-series using GAM.

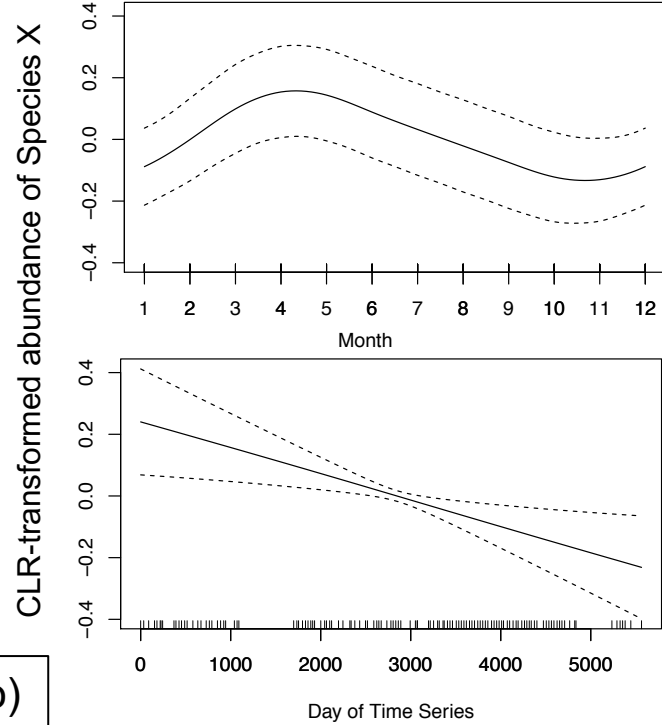

3.) Check to see if there is significant autocorrelation in GAM residuals.

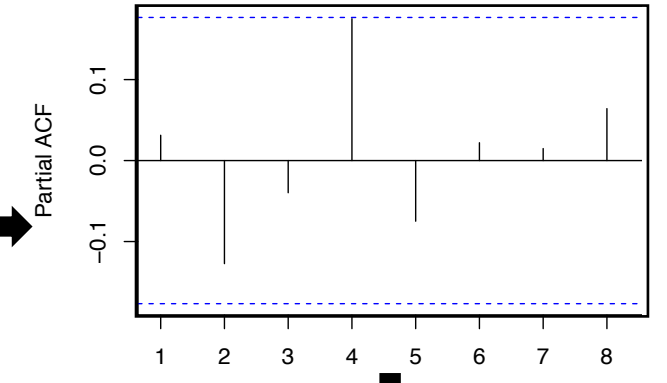

6.) Network outputs

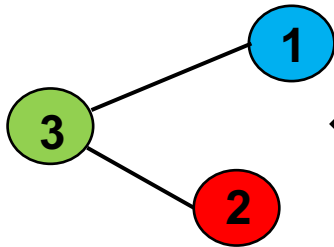

5a.) Graphical lasso (Glasso)

|           | Species 1 | Species 2 | Species 3 |
|-----------|-----------|-----------|-----------|
| Species 1 | 0         | 0         | 1         |
| Species 2 | 0         | 0         | 1         |
| Species 3 | 1         | 1         | 0         |

5b.) Pairwise spearman correlation (SCC)

|           | Species 1 | Species 2 | Species 3 |
|-----------|-----------|-----------|-----------|
| Species 1 | 0         | 0.33      | 0.74      |
| Species 2 | 0.33      | 0         | 0.66      |
| Species 3 | 0.74      | 0.66      | 0         |

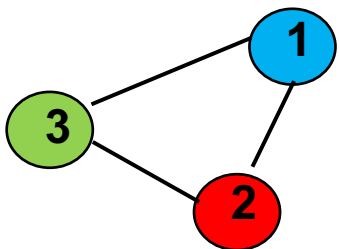

4.) Use GAM residuals as input for network analysis.

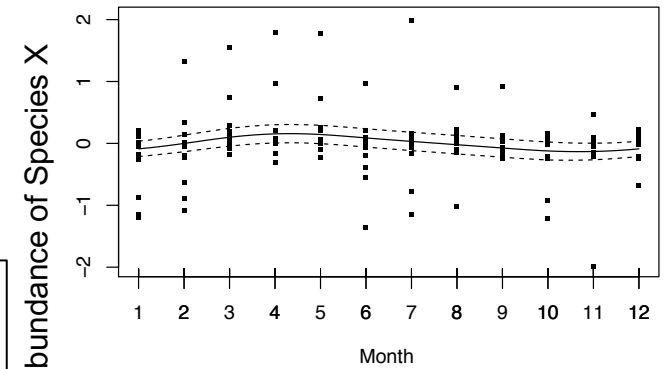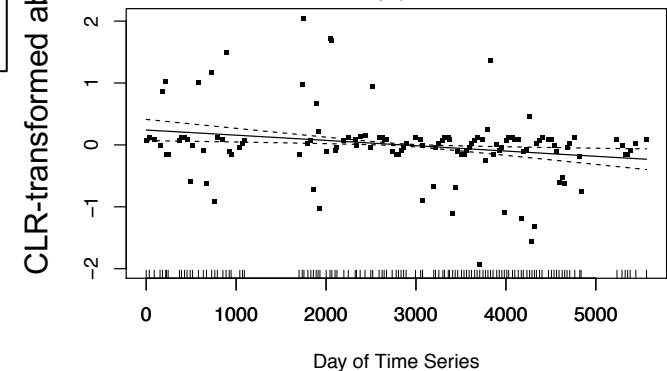

Percent of species with seasonal signal ○ 0% ● 25% ● 50% ● 100%

Percent of species with long-term trend ○ 0% △ 50%

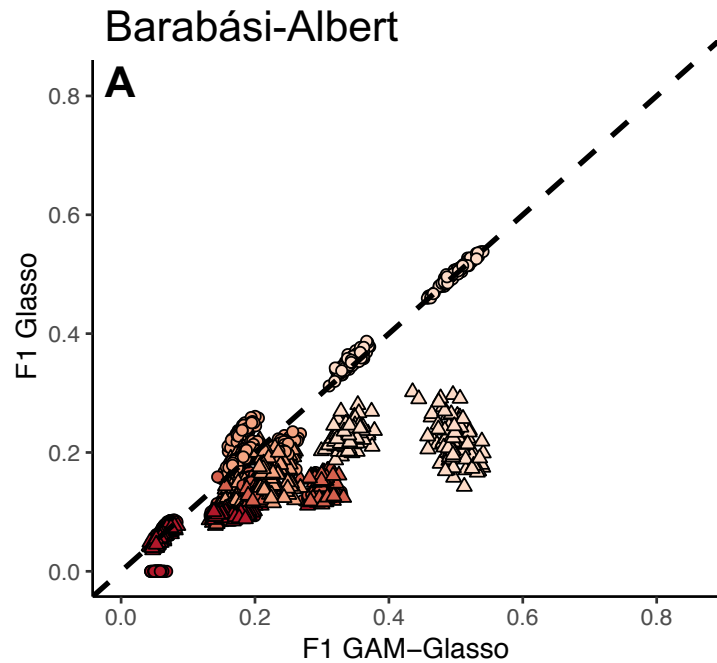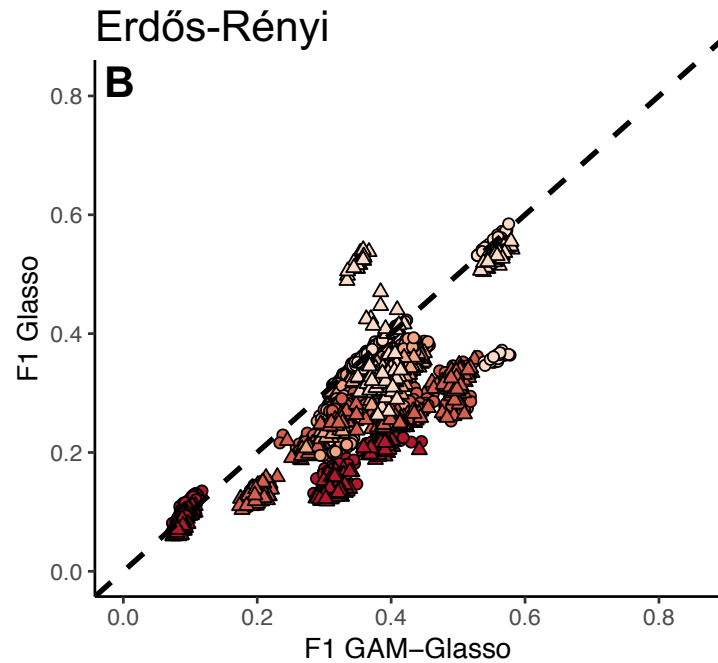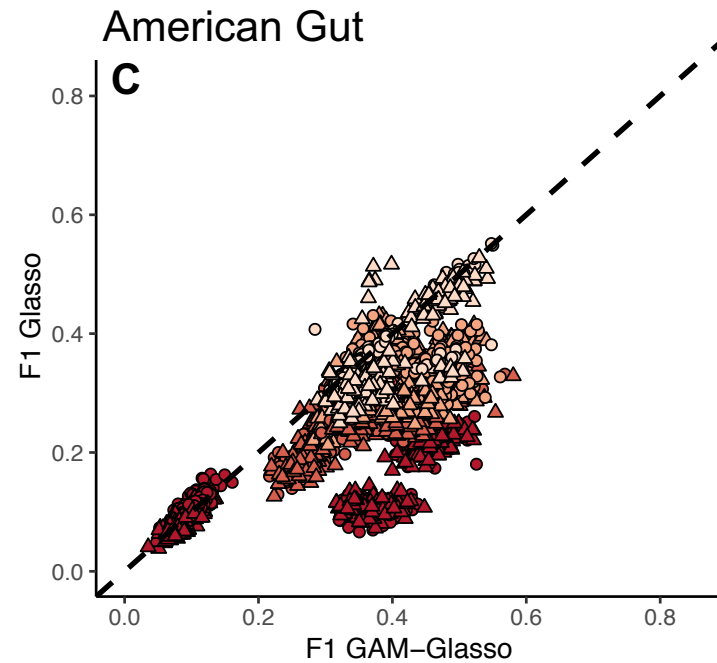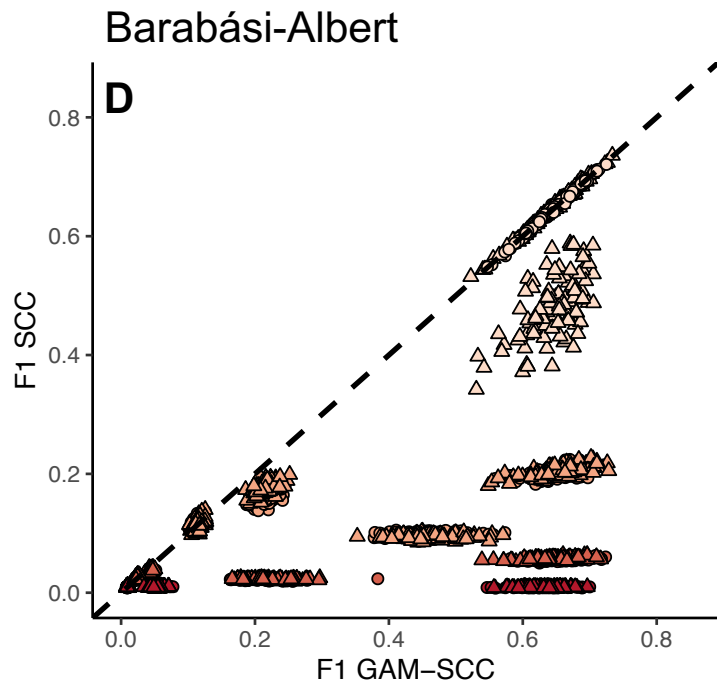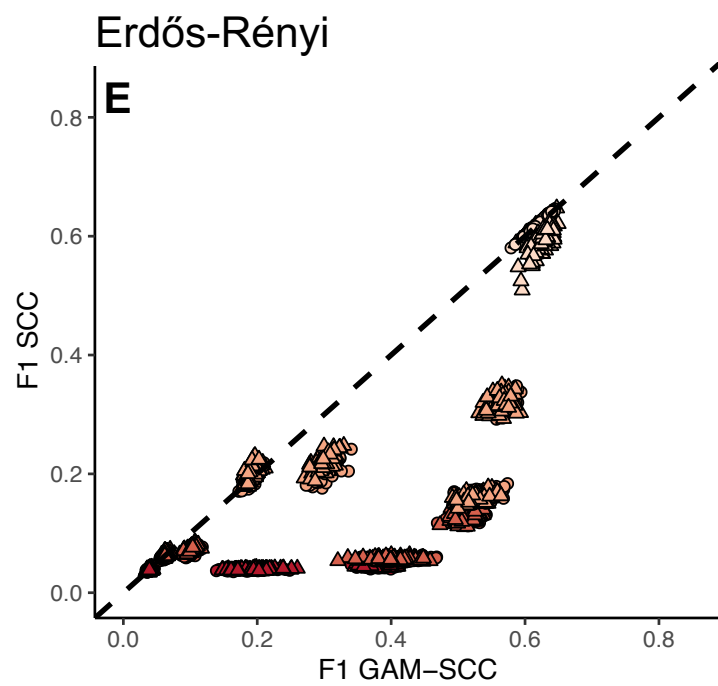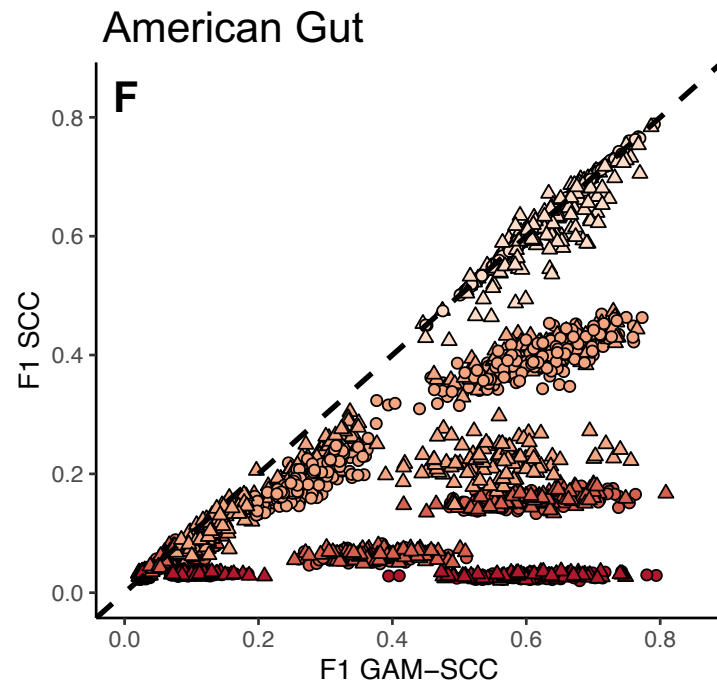

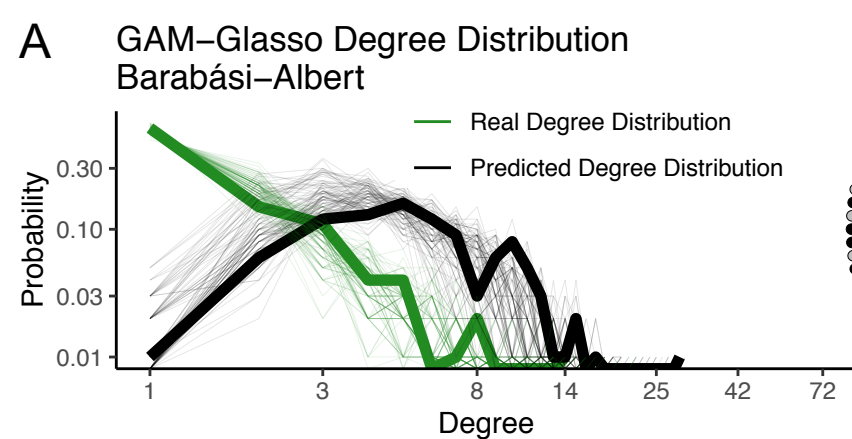

Precision =  $0.29 \pm 0.051$   
 Recall =  $0.76 \pm 0.050$   
 F1 =  $0.42 \pm 0.055$   
 Clustering Coefficient =  $0.27 \pm 0.037$  ( $0 \pm 0$ )

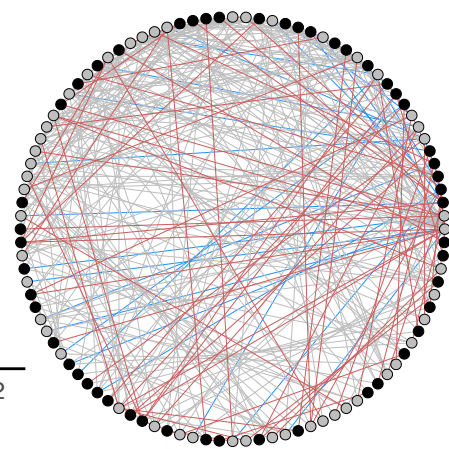

— False Positives  
 — True Positives  
 — False Negatives

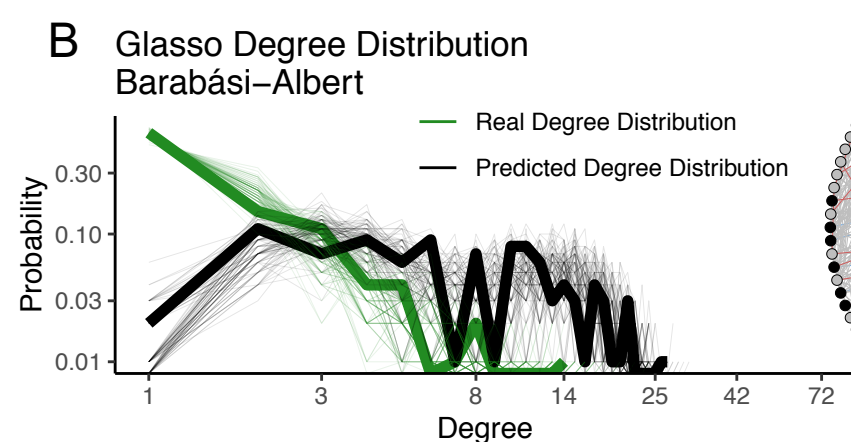

Precision =  $0.14 \pm 0.016$   
 Recall =  $0.69 \pm 0.063$   
 F1 =  $0.24 \pm 0.025$   
 Clustering Coefficient =  $0.34 \pm 0.030$  ( $0 \pm 0$ )

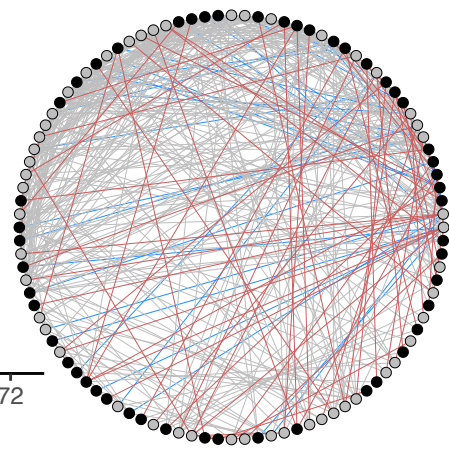

— False Positives  
 — True Positives  
 — False Negatives

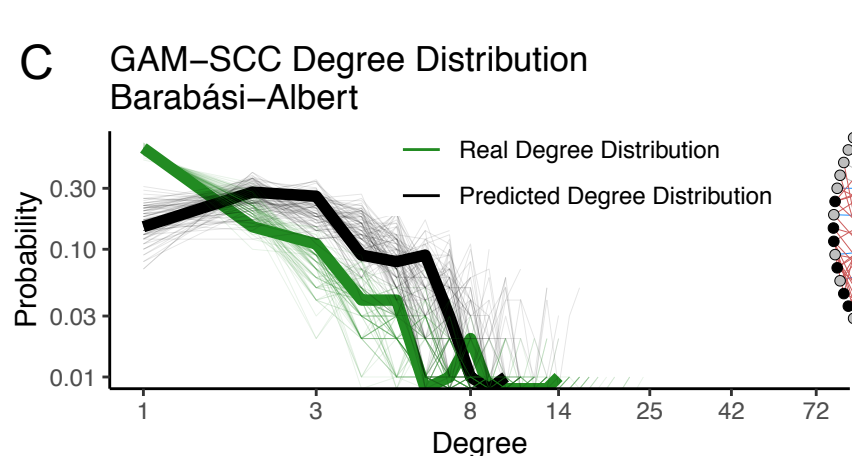

Precision =  $0.53 \pm 0.066$   
 Recall =  $0.85 \pm 0.033$   
 F1 =  $0.65 \pm 0.055$   
 Clustering Coefficient =  $0.71 \pm 0.053$  ( $0 \pm 0$ )

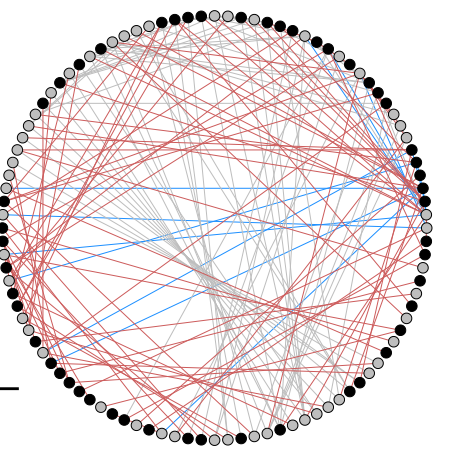

— False Positives  
 — True Positives  
 — False Negatives

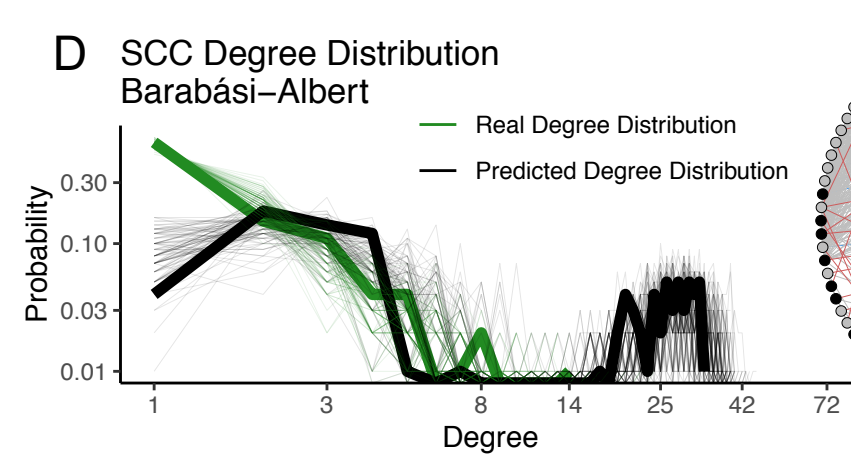

Precision =  $0.091 \pm 0.0073$   
 Recall =  $0.70 \pm 0.040$   
 F1 =  $0.16 \pm 0.012$   
 Clustering Coefficient =  $0.65 \pm 0.035$  ( $0 \pm 0$ )

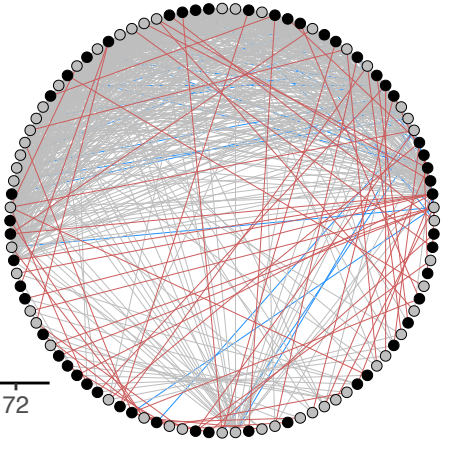

— False Positives  
 — True Positives  
 — False Negatives

### A GAM-Glasso Degree Distribution

Erdős-Rényi

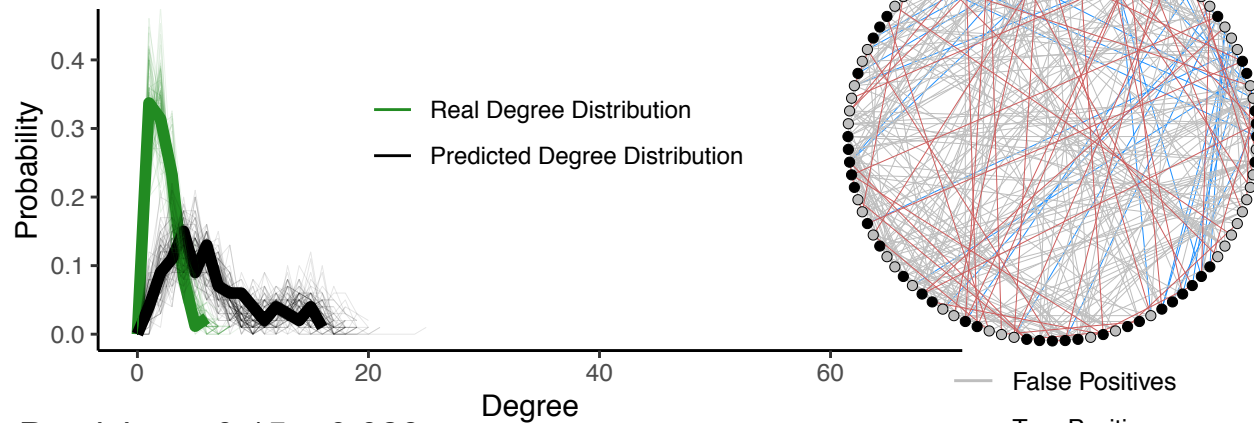

Precision =  $0.15 \pm 0.028$

Recall =  $0.49 \pm 0.053$

F1 =  $0.23 \pm 0.036$

Clustering Coefficient =  $0.33 \pm 0.038$  ( **$0.021 \pm 0.018$** )

### B Glasso Degree Distribution

Erdős-Rényi

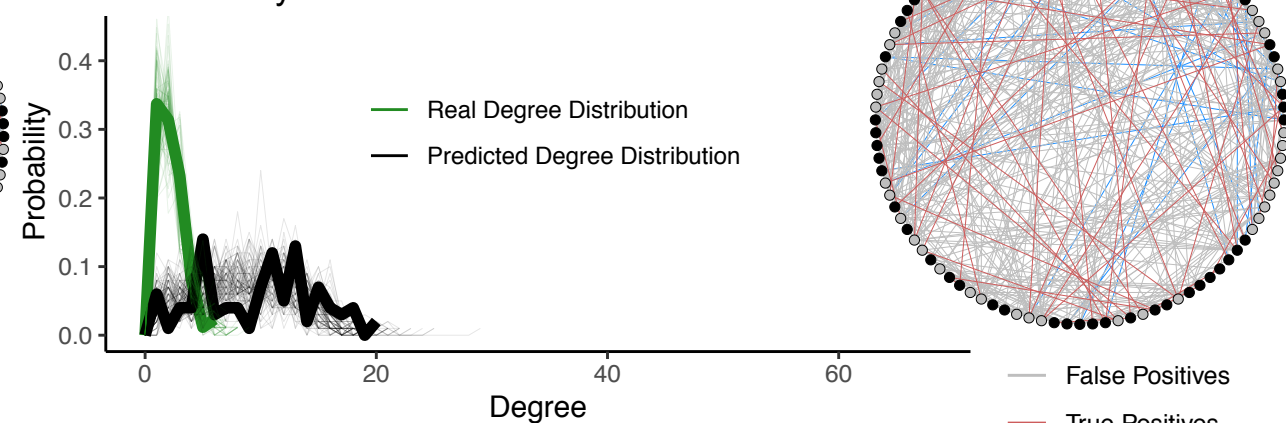

Precision =  $0.11 \pm 0.017$

Recall =  $0.48 \pm 0.053$

F1 =  $0.18 \pm 0.025$

Clustering Coefficient =  $0.36 \pm 0.028$  ( **$0.021 \pm 0.018$** )

### C GAM-SCC Degree Distribution

Erdős-Rényi

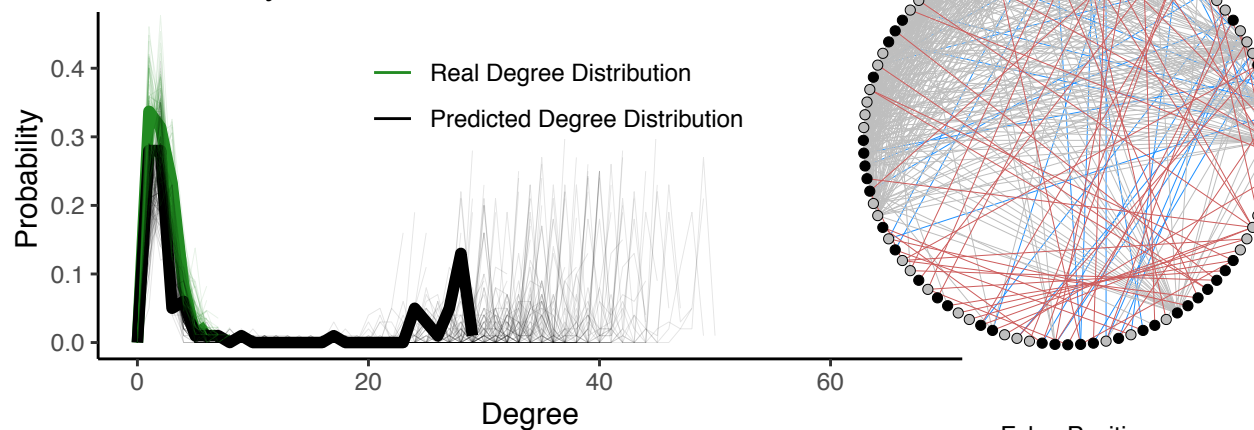

Precision =  $0.086 \pm 0.030$

Recall =  $0.56 \pm 0.041$

F1 =  $0.15 \pm 0.044$

Clustering Coefficient =  $0.78 \pm 0.060$  ( **$0.021 \pm 0.018$** )

### D SCC Degree Distribution

Erdős-Rényi

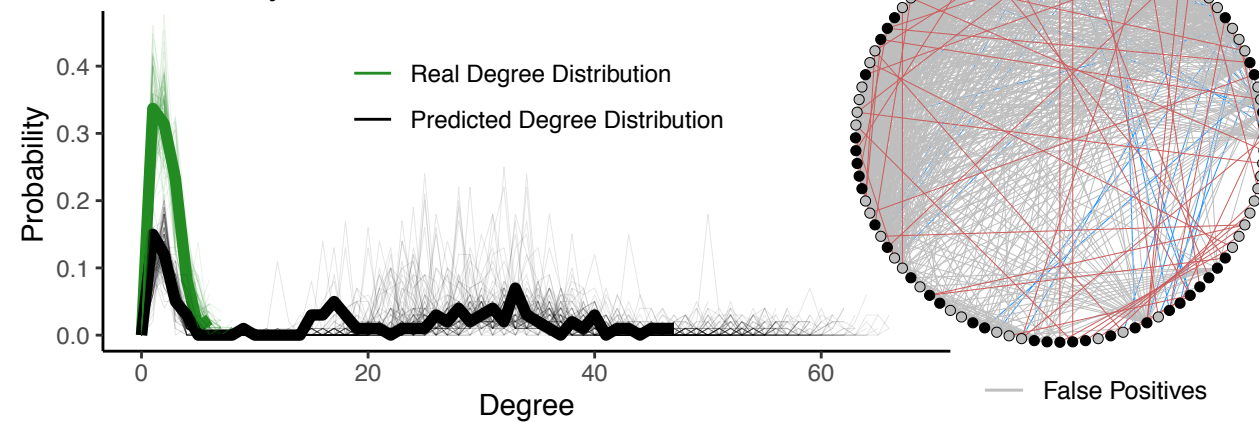

Precision =  $0.047 \pm 0.0093$

Recall =  $0.53 \pm 0.051$

F1 =  $0.085 \pm 0.016$

Clustering Coefficient =  $0.72 \pm 0.041$  ( **$0.021 \pm 0.018$** )
